# Supplementary material
Source: ML conference proceedings conference paper supplement (https://proceedings.neurips.cc/paper_files/paper/2020/hash/24368c745de15b3d2d6279667debcba3-Abstract.html)
Supplement: Supplementary file [file 24368c745de15b3d2d6279667debcba3-Supplemental.zip]

## Supplementary Material

### Proofs

#### Proof of Lemma 2.1

*Proof.*

$$\begin{aligned}
 V(i, j) &= \int_{\mathbb{R}^n} \theta(x - x_i) \theta(x - x_j) \phi(x) d \left( \prod_{k=1}^n \mu_k(x^k) \right). \\
 V(i, j) &= \prod_{k=1}^n \int_{\mathbb{R}} \theta(x^k - x_i^k) \theta(x^k - x_j^k) d\mu_k(x^k) = \prod_{k=1}^n \int_{\max(x_i^{k-}, x_j^{k-})}^{\infty} d\mu_k(x^k) \\
 &= \prod_{k=1}^n [1 - \mu_k(\max(x_i^{k-}, x_j^{k-}))].
 \end{aligned}$$

□

#### Proof of Lemma 3.1

*Proof.* Consider a Bernoulli trial  $Z(t)$ , with

$$Z(t) = \prod_{k=1}^n \mathcal{I}_{t^k \geq \max(x_i^k, x_j^k)}.$$

Therefore

$$p(Z(t) = 1) = \prod_{k=1}^n [1 - \mu_k^{\text{target}}(\max(x_i^{k-}, x_j^{k-}))].$$

Also note from Lemma 2.1,

$$V^{\text{true}}(i, j) = \prod_{k=1}^n [1 - \mu_k^{\text{target}}(\max(x_i^{k-}, x_j^{k-}))].$$

Hence, we have  $V^{\text{true}}(i, j) = p(Z(t) = 1)$ .  $\hat{V}(i, j)$  can be rewritten as  $\hat{V}(i, j) = \frac{1}{M} \sum_{q=1}^M Z(t_q)$ . Therefore,  $\hat{V}(i, j)$  denotes the sample mean of the Bernoulli trial  $Z(t)$  with samples  $Z(t_1), Z(t_2), \dots, Z(t_m)$ . We know that sample mean of a Bernoulli trial is unbiased and a sufficient statistic for  $p(Z(t) = 1)$ . Hence,  $\hat{V}(i, j)$  is the minimum variance unbiased estimator of  $p(Z(t) = 1)$  [Duda and Hart, 1973].

□

#### Proof of Theorem 3.2

*Proof.* For ease of notation, we prove the theorem assuming continuous  $\mu^{\text{target}}(\cdot)$  (check footnote<sup>1</sup>)

---

<sup>1</sup>For cumulative distribution functions that are not left continuous, we can replace  $\mu^{\text{target}}(x)$  by  $\mu^{\text{target}}(x^-)$  at points of discontinuity.

For convenience assume  $m_{ij} = \max(x_i, x_j)$ . Further we know that

$$V^{true}(i, j) = 1 - \mu^{target}(m_{ij}),$$

$$\hat{V}(i, j) = \frac{1}{M} \sum_{q=1}^M \mathcal{I}_{t_q \geq m_{ij}} = 1 - \frac{1}{M} \sum_{q=1}^M \mathcal{I}_{t_q < m_{ij}}$$

We define

$$D_{KS} \triangleq \sup_x \left| \frac{1}{M} \sum_{q=1}^M \mathcal{I}_{t_q < x} - \mu^{target}(x) \right|$$

$D_{KS}$  is popularly known as Kolmogorov-Smirnov distance [Kolmogorov, 1933, Smirnov, 1948]. Therefore, we have

$$\begin{aligned} \left| V^{true}(i, j) - \hat{V}(i, j) \right| &= \left| \frac{1}{M} \sum_{q=1}^M \mathcal{I}_{t_q < m_{ij}} - \mu^{target}(m_{ij}) \right| \\ &\leq D_{KS} \end{aligned}$$

$$\begin{aligned} \left| \rho^2(V^{true}) - \rho^2(\hat{V}) \right| &= \left| \frac{1}{N^2} \sum_{i,j=1}^N l_i l_j \left[ V^{true}(i, j) - \hat{V}(i, j) \right] \right| \\ &\leq \frac{1}{N^2} \sum_{i,j=1}^N |l_i l_j| \left| V^{true}(i, j) - \hat{V}(i, j) \right| \\ &\leq \frac{1}{N^2} D_{KS} \sum_{i,j=1}^N |l_i l_j| \end{aligned}$$

Now using Massart's Inequality [Dudley, 2014],  $\Pr(D_{KS} > \epsilon) < 2e^{-2M\epsilon^2}$ . Therefore the statement of theorem follows by choosing  $\epsilon = \sqrt{\frac{\log M}{M}}$ .  $\square$

### Proof of Theorem 3.3

*Proof.* We first note that

$$\left| \rho^2(V^{true}) - \rho^2(\hat{V}) \right| \leq \frac{1}{N^2} \sum_{i,j} |l_i l_j| \left| V^{true}(i, j) - \hat{V}(i, j) \right|. \quad (1)$$

We prove this theorem by giving a bound for  $\frac{1}{N^2} \sum_{i,j} \left| V^{true}(i, j) - \hat{V}(i, j) \right|$ . From the proof of Lemma 3.1,  $\hat{V}(i, j)$  denotes the sample mean of i.i.d. Bernoulli random variables with  $V^{true}(i, j)$  being the expected value. Hence, by the Hoeffding inequality

$$\Pr(\left| V^{true}(i, j) - \hat{V}(i, j) \right| > \delta) < 2e^{-2M\delta^2}$$

Now, we can use the union bound and the fact that  $|V^{true}(i, j) - \hat{V}(i, j)| = |V^{true}(j, i) - \hat{V}(j, i)|$  to get

$$\begin{aligned} \Pr\left(\frac{1}{N^2} \sum_{i,j} \left| V^{true}(i, j) - \hat{V}(i, j) \right| \leq \delta\right) \\ \geq 1 - 2\left(\frac{N(N-1)}{2} + N\right)e^{-2M\delta^2} \\ = 1 - N(N+1)e^{-2M\delta^2} \end{aligned}$$

Now letting  $\delta' = \delta \max_{i,j} |l_i l_j|$ , we use inequality (1) to obtain the required result.  $\square$

## Gradient Boosting with $V$ matrix

In the gradient boosting framework introduced by Friedman [Friedman, 2001], the estimate  $\hat{y}_i$  of  $y_i$  is mathematically modeled as follows:

$$\hat{y}_i = \sum_{k=1}^K f_k(x_i), \quad f_k \in \mathcal{F} \quad (2)$$

where  $K$  is the number of trees,  $f$  is a function the functional space  $\mathcal{F}$  and  $\mathcal{F}$  is the set all possible Classification and Regression Trees (CARTs). The objective function to be optimized is given by

$$obj = \sum_{i=1}^n l(y_i, \hat{y}_i) + \sum_{k=1}^K \Omega(f_k) \quad (3)$$

However, in this loss function the samples  $x_i$  are assumed to be independent. In a realistic scenario, samples may not be independent, for example, the samples may be derived from different races and genders giving rise to implicit bias in the training dataset. To encounter this, we can have a loss function that takes into account the associations between different loss function. This is tackled by using a  $V$ -matrix which also measures the distance between the sample points. Formally, the objective or loss function is given as follows:

$$obj = \sum_{i=1}^n \sum_{j=1}^n l(y_i, y_j, \hat{y}_i, \hat{y}_j, V_{ij}) + \sum_{k=1}^K \Omega(f_k) \quad (4)$$

Note we use  $V_{ij}$  to denote  $V(i, j)$  here. The proof below deals with a special case when  $l(y_i, y_j, \hat{y}_i, \hat{y}_j, V_{ij}) = (y_i - \hat{y}_i)(y_j - \hat{y}_j)V_{ij}$ .

## Proof

$$obj = \sum_{i=1}^n \sum_{j=1}^n (y_i - \hat{y}_i)(y_j - \hat{y}_j)V_{ij} + \sum_{k=1}^K \Omega(f_k) \quad (5)$$

$$\hat{y}_i^{(t)} = \sum_{k=1}^t f_k(x_i) = \hat{y}_i^{(t-1)} + f_t(x_i) \quad (6)$$

$$\begin{aligned} obj^{(t)} &= \sum_{i,j=1}^n (y_i - [\hat{y}_i^{(t-1)} + f_t(x_i)])(y_j - [\hat{y}_j^{(t-1)} + f_t(x_j)])V_{ij} \\ &+ \sum_{k=1}^t \Omega(f_k) \\ &= obj^{(t-1)} + \sum_{i,j=1}^n f_t(x_j)(\hat{y}_i^{(t-1)} - y_i)V_{ij} + \\ &\sum_{i,j=1}^n [f_t(x_i)(\hat{y}_j^{(t-1)} - y_j) + f_t(x_i)f_t(x_j)]V_{ij} + \Omega(f_t) \\ &= \sum_{i,j=1}^n [f_t(x_j)(\hat{y}_i^{(t-1)} - y_i) + f_t(x_i)(\hat{y}_j^{(t-1)} - y_j)]V_{ij} \\ &+ \sum_{i,j=1}^n f_t(x_i)f_t(x_j)V_{ij} + \Omega(f_t) + constant \end{aligned} \quad (7)$$

$f_t(x)$  and  $\Omega(f_t)$  are defined as follows:

$$f_t(x) = w_{q(x)}, \quad w \in \mathbb{R}^T, \quad q : \mathbb{R}^d \rightarrow \{1, 2, \dots, T\}. \quad (8)$$

where  $w$  is the vector of scores on leaves,  $q$  is a function assigning each data point to the corresponding leaf, and  $T$  is the number of leaves. The complexity  $\Omega(f_t)$  is given by

$$\Omega(f_t) = \gamma T + \frac{1}{2} \lambda \sum_{j=1}^T w_j^2 \quad (9)$$

Let  $g_i = \hat{y}_i^{(t-1)} - y_i$ , and  $I_j$  be the set of all  $x_i$  that belong to leaf  $j$ , i.e.  $I_j = \{i | q(x_i) = j\}$ , then

$$\begin{aligned}
obj^{(t)} &= \sum_{i,j=1}^n [f_t(x_j)g_i + f_t(x_i)g_j + f_t(x_i)f_t(x_j)]V_{ij} \\
&\quad + \Omega(f_t) + constant \\
&= \sum_{i,j=1}^n [w_{q(x_j)}g_i + w_{q(x_i)}g_j + w_{q(x_i)}w_{q(x_j)}]V_{ij} \\
&\quad + \Omega(f_t) + constant \\
&= \sum_{k=1}^T w_k [\sum_{i=1}^n \sum_{j \in I_k} g_i V_{ij} + \sum_{i \in I_k} \sum_{j=1}^n g_j V_{ij}] \\
&\quad + \sum_{l=1}^T \sum_{m=1}^T w_l w_m \sum_{i \in I_l} \sum_{j \in I_m} V_{ij} + \frac{1}{2} \lambda \sum_{k=1}^T w_k^2 \\
&\quad + \gamma T + constant \\
&= \sum_{k=1}^T w_k [A_k + B_k] + \sum_{l=1}^T \sum_{m=1}^T w_l w_m C_{lm} \\
&\quad + \frac{1}{2} \lambda \sum_{k=1}^T w_k^2 + \gamma T + constant
\end{aligned} \tag{10}$$

where

$$A_k = \sum_{i=1}^n \sum_{j \in I_k} g_i V_{ij} = \sum_{i=1}^n g_i \sum_{j \in I_k} V_{ij} \tag{11}$$

$$B_k = \sum_{i \in I_k} \sum_{j=1}^n g_j V_{ij} = \sum_{j=1}^n g_j \sum_{i \in I_k} V_{ij} \tag{12}$$

$$C_{lm} = \sum_{i \in I_l} \sum_{j \in I_m} V_{ij} \tag{13}$$

Taking partial derivative of  $obj^{(t)}$  with respect to  $w_i$  gives us

$$A_i + B_i + \sum_{j=1}^T [w_j (C_{ij} + C_{ji})] + \lambda w_i = 0 \quad \forall i \in \{1, 2, \dots, T\}. \tag{14}$$

Eq. (14) can be rewritten as:

$$Dw^* = U. \tag{15}$$

where  $w^*$  is the optimal  $w$ ,  $D$  is a  $T \times T$  matrix with

$$D_{ij} = C_{ij} + C_{ji}, \quad j \neq i$$

$$D_{ii} = 2C_{ii} + \lambda.$$

or in other words

$$D = C + C^T + \lambda I, \quad I : \text{identity matrix}$$

Also note that  $D^T = D$ .  $U$  is a  $T \times 1$  vector with

$$U_i = -(A_i + B_i).$$

If  $D$  is invertible, then

$$w^* = D^{-1}U. \quad (16)$$

The  $obj^{(t)}$  function from Eq. (10) can be rewritten as:

$$obj^{(t)} = -w^T U + w^T C^T w + \frac{1}{2} \lambda w^T w. \quad (17)$$

For  $w = w^*$ ,  $obj^{(t)}$  denoted by  $obj^*$  is given by:

$$\begin{aligned} obj^* &= -U^T (D^{-1})^T U + U^T (D^{-1})^T C^T D^{-1} U \\ &\quad + \frac{1}{2} \lambda U^T (D^{-1})^T D^{-1} U + \gamma T + \text{constant} \\ &= -U^T (D^T)^{-1} U + U^T (D^T)^{-1} C^T D^{-1} U \\ &\quad + \frac{1}{2} \lambda U^T (D^T)^{-1} D^{-1} U + \gamma T + \text{constant} \\ &= -U^T D^{-1} U + U^T D^{-1} C^T D^{-1} U \\ &\quad + \frac{1}{2} \lambda U^T D^{-1} D^{-1} U + \gamma T + \text{constant} \end{aligned} \quad (18)$$

When  $V_{ij} = V_{ji}$ ,  $obj^*$  in Eq. (18) above can be further simplified. Note that, here  $C^T = C$  which implies

$$C^T = \frac{1}{2} [D - \lambda I]. \quad (19)$$

Plugging  $C^T$  from (19) above in Eq. (18), we get

$$obj^* = -\frac{1}{2} U^T D^{-1} U + \gamma T + \text{constant}. \quad (20)$$

Eqs. (18) and (20) provide a metric to evaluate the goodness of the  $t$ -th tree in the gradient boosting algorithm.

**Note:**  $V_{ij} = V_{ji}$  also implies that  $A = B$ .

## References

[Duda and Hart, 1973] Duda, R. O. and Hart, P. E. (1973). *Pattern Classification and Scene Analysis*. John Wiley & Sons, New York.

- [Dudley, 2014] Dudley, R. M. (2014). *Uniform Central Limit Theorems*. Cambridge Studies in Advanced Mathematics. Cambridge University Press, 2 edition.
- [Friedman, 2001] Friedman, J. H. (2001). Greedy function approximation: A gradient boosting machine. *Ann. Math. Statist.*, (5):1189–1232.
- [Kolmogorov, 1933] Kolmogorov, A. N. (1933). Sulla determinazione empirica di una legge di distribuzione. *Giornale dell'Istituto Italiano degli Attuari*, 4:83–91.
- [Smirnov, 1948] Smirnov, N. (1948). Table for estimating the goodness of fit of empirical distributions. *Ann. Math. Statist.*, (2):279–281.
